# Supplementary material for: Population structure and genome-wide association analysis for frost tolerance in oat using continuous SNP array signal intensity ratios
Source: PubMed Central journal article supplement (PMC4983288; doi:10.1007/s00122-016-2734-y), 2016-06-18
Supplement: 122_2016_2734_MOESM1_ESM.pdf [file 122_2016_2734_MOESM1_ESM.pdf]

| <b>FAO.code</b> | <b>Accession.number</b> | <b>Species</b> | <b>Country</b> | <b>Accession.name</b>    | <b>Registration</b> | <b>Annuality</b> |
|-----------------|-------------------------|----------------|----------------|--------------------------|---------------------|------------------|
| AUT001          | BVAL-450001             | sativa         | AUT            | Attergauer Nackthafer    | 1950                |                  |
| AUT001          | BVAL-451001             | strigosa       | AUT            | Sandhafer                | 1976                |                  |
| AUT005          | RINN-455018             | sativa         | AUT            | Spitzhafer               |                     |                  |
| AUT016          | Cavallo                 | sativa         | AUT            | Cavallo                  | 2001                | Spring           |
| AUT016          | CPVO19952388            | sativa         | AUT            | MONARCH                  | 1996                | Spring           |
| AUT056          | CPVO20062595            | sativa         | AUT            | EFFEKTIV                 | 2006                | Spring           |
| BGR001          | A7BM0001                | sativa         | BGR            | Mina                     |                     | Spring           |
| BGR001          | A7BM0002                | sativa         | BGR            | Dulo                     |                     | Winter           |
| BGR001          | A7BM0005                | sativa         | BGR            | 83/200-CR                |                     | Winter           |
| BGR001          | A7BM0006                | sativa         |                |                          |                     |                  |
| BGR001          | BGR 12088               | sativa         | FRA            | AVOINE DU PRIEURE        | 1982                |                  |
| BGR001          | BGR 24958               | sativa         |                | WORONEZH                 | 1983                |                  |
| BGR001          | BGR 24983               | sativa         | BGR            | K 06-08                  |                     | Spring           |
| BGR001          | BGR 25059               | sativa         |                |                          |                     |                  |
| BGR001          | BGR 7982                | strigosa       |                |                          | 1939                |                  |
| BOREAL          | VELI                    | sativa         | FIN            | VELI                     |                     |                  |
| CZE047          | 03C0700014              | sativa         | CZE            | Brnensky Zlatak          | 1936                | Spring           |
| CZE047          | 03C0700106              | sativa         | YUG            | Z 164                    | 1974                | Spring           |
| CZE047          | 03C0700402              | sativa         | HUN            | Szegedi                  | 1964                | Winter           |
| CZE047          | 03C0700819              | byzantina      | ITA            | Puglieze                 | 1952                | Spring           |
| CZE047          | 03C0701326              | sativa         | SUN            | Uzbekij Sirokolistyj     | 1980                | Spring           |
| CZE047          | 03C0701732              | sativa         | CZE            | Auron                    | 1991                |                  |
| CZE047          | 03C0701982              | sativa         | CZE            | Dalimil                  |                     |                  |
| CZE047          | Saul                    | sativa         | CZE            | Saul                     | 2005                |                  |
| CZE074          | Raven                   | sativa         | CZE            | Raven                    | 2008                |                  |
| DEU060          | Flaemingsgold           | sativa         | DEU            | Flämingsgold             | 2008                | Spring           |
| DEU060          | LPSH 02-202             | sativa         | DEU            | LPSH 02-202              |                     | Spring           |
| DEU060          | LPSH 02-239             | sativa         | DEU            | LPSH 02-239              |                     | Spring           |
| DEU087          | CPVO20040091            | sativa         | DEU            | IVORY                    | 2004                | Spring           |
| DEU087          | CPVO20060096            | sativa         | DEU            | TYPHON                   | 2006                | Spring           |
| DEU087          | CPVO20070095            | sativa         | DEU            | PERGAMON                 | 2007                | Spring           |
| DEU087          | CPVO20080196            | sativa         | DEU            | Scorpion                 | 2008                | Spring           |
| DEU146          | AVE 1284                | sativa         | ROM            |                          |                     |                  |
| DEU146          | AVE 271                 | sativa         | GRC            |                          |                     |                  |
| DEU146          | AVE 313                 | sativa         | DEU            | Rotenburger Schwarzhafer | 1922                |                  |

|        |              |          |     |                                     |      |        |
|--------|--------------|----------|-----|-------------------------------------|------|--------|
| DEU146 | AVE 3332     | sativa   | DEU | Nuernberg 8 ("100 Jaehriger Hafer") | 1832 | Spring |
| DEU146 | AVE 3334     | sativa   | DEU | Weihenstephaner Weiss               |      | Spring |
| DEU146 | AVE 35       | strigosa |     | Rauhhafer aus Hamstedt              |      |        |
| DEU146 | AVE 399      | sativa   | DEU | Rheinischer Gelb                    | 1933 |        |
| DEU146 | AVE 4388     | sativa   | DEU | Borreck                             | 1960 | Spring |
| DEU146 | AVE 4659     | sativa   | DEU | Lueneburger Kley Neue Zucht         | 1950 | Spring |
| DEU146 | AVE 615      | sativa   | DEU | Gelber Riesenfahnen                 | 1891 |        |
| DEU387 | CPVO20040125 | sativa   | DEU | KAPLAN                              | 2004 | Spring |
| DEU481 | CPVO20010181 | sativa   | DEU | LEO                                 | 2001 | Spring |
| ESP004 | BGE002046    | sativa   | ESP | Avena                               | 1979 |        |
| ESP004 | BGE004766    | strigosa | ESP | Avea negra                          | 1981 |        |
| ESP004 | BGE025428    | sativa   | ESP | Avena de boruca                     | 1996 |        |
| EST001 | 00004        | sativa   | EST | Jaak                                | 1995 |        |
| EST001 | 00005        | sativa   | EST | Jõgeva Agu                          | 1939 |        |
| EST001 | 00011        | sativa   | EST | Miku                                | 1991 |        |
| EST001 | 00012        | sativa   | EST | Viker                               | 1976 |        |
| EST001 | 00013        | sativa   | EST | Villu                               | 1999 |        |
| FRA040 | 19283        | sativa   | FRA | NOIRE DE L'AUBE                     | 1954 | Spring |
| FRA040 | 19303        | sativa   | FRA | NUE GROSSE                          | 1978 | Spring |
| FRA040 | 19357        | sativa   | FRA | GRISE DE HOUDAN                     | 1912 | Spring |
| FRA040 | 19371        | sativa   | FRA | JOANETTE (AVOINE DE CHENAILLES)     | 1888 | Spring |
| FRA040 | 19494        | sativa   |     | SAINT PAUL LE FROID                 | 2000 |        |
| FRA040 | 19619        | sativa   | FRA | BLANCHE NEIGE                       | 1956 | Winter |
| FRA040 | 19620        | sativa   | FRA | LA GAILLARDE                        | 1950 |        |
| FRA040 | 19631        | sativa   | FRA | SOUVERAINE LEPEUPLE                 | 1940 | Winter |
| FRA040 | 19632        | sativa   | USA | CIMARRON                            | 1954 | Winter |
| FRA040 | 30040        | sativa   | FRA | AUTEUIL                             |      | Spring |
| FRA261 | AINTREE      | sativa   | FRA | AINTREE                             | 1992 | Winter |
| FRA261 | CPVO19981528 | sativa   | FRA | EVORA                               | 1999 | Winter |
| GBR011 | 00004        | sativa   | GBR | FELTWELL                            | 1964 | Winter |
| GBR011 | 00009        | sativa   | GBR | PENRHYN                             | 1958 | Winter |
| GBR011 | 00036        | sativa   | YUG | BELYSKI (BELJSKA 200)               |      | Winter |
| GBR011 | 00037        | sativa   | YUG | LUILBREG                            |      | Winter |
| GBR011 | 01243        | sativa   | GBR | CASTLETON POTATO                    | 1935 | Spring |
| GBR011 | 02214        | strigosa | GBR | TIREE OAT                           | 1949 | Spring |
| GBR016 | Lennon       | sativa   | GBR | Lennon                              |      | Spring |

|        |            |            |     |                        |      |        |
|--------|------------|------------|-----|------------------------|------|--------|
| GBR016 | Millennium | sativa     | GBR | Millennium             | 2000 | Winter |
| HUN003 | RCAT010895 | sativa     | HUN | Szegedi                | 1964 |        |
| HUN003 | RCAT012421 | sativa     | HUN | Kulsovati B tf.        | 1976 |        |
| HUN003 | RCAT012599 | sativa     | FIN | Sisu                   | 1948 |        |
| HUN003 | RCAT012607 | sativa     | HUN | V.Kalbens Vienauer     | 1903 |        |
| HUN003 | RCAT013381 | sativa     | HUN | Monostorpalyi tf.      | 1976 |        |
| HUN003 | RCAT013388 | sativa     | HUN | Anarcsi tf.            | 1976 |        |
| HUN003 | RCAT013398 | sativa     | HUN | Pusztafoldvari tf.     | 1976 |        |
| IRL029 | 18         | sativa     | IRL | GLASNEVIN TRIUMPH      | 1885 |        |
| IRL029 | 3          | sativa     | IRL | Ayr Ally               | 1959 |        |
| IRL029 | 6          | sativa     | IRL | Glasnevin Ardri        | 1932 |        |
| ITA037 | 10         | sativa     | ITA | AVA                    | 1969 |        |
| ITA037 | 47         | sativa     | ITA | MONTAGNANA             | 1979 |        |
| ITA037 | 605        | sativa     | ITA | DONATA                 | 1999 |        |
| ITA037 | 683        | sativa     | ITA | Primula                | 2002 | Spring |
| ITA037 | 690        | sativa     | ITA | Bionda                 | 2003 |        |
| ITA037 | 695        | sativa     | ITA | Teo BD40               | 2003 |        |
| ITA037 | 700        | sativa     | ITA | Genziana               | 2004 |        |
| ITA037 | 708        | sativa     | ITA | Novella Antonia        | 2005 |        |
| ITA037 | 8          | sativa     | ITA | ARGENTINA              | 1969 |        |
| LTU001 | 1114       | sativa     | LTU | 1404-11                | 2000 |        |
| LTU001 | 25         | sativa     | LTU | Jaugila                | 1994 |        |
| LVA010 | LVA00027   | sativa     | LVA | Stendes Velas          | 1999 |        |
| NLD037 | CGN03419   | sativa     | NLD | Zwarte President       | 1935 |        |
| POL003 | PL50406    | sativa     | POL | PULAWSKI SREDNIORYCHLY | 1919 |        |
| POL003 | PL50528    | sativa     | POL | GORSKI BIALY           | 1976 |        |
| POL003 | PL50731    | sativa     | POL | PLATEK                 | 1974 |        |
| POL003 | PL50951    | sativa     | USA |                        | 1923 |        |
| POL003 | PL50976    | sativa     | POL | TEODOZJA               |      |        |
| POL003 | PL51193    | abyssinica |     |                        | 2000 |        |
| POL003 | PL51229    | sativa     | POL | PROPORCZYK             | 1953 |        |
| POL040 | Arab       | sativa     | POL | Arab                   | 2004 |        |
| POL040 | Breton     | sativa     | POL | Breton                 | 2008 |        |
| POL040 | Hetman     | sativa     | POL | Hetman                 | 2003 |        |
| POL040 | Zuch       | sativa     | POL | Zuch                   | 2008 |        |
| POL054 | Krezus     | sativa     | POL | Krezus                 | 2005 | Spring |

|        |              |           |     |                       |      |        |
|--------|--------------|-----------|-----|-----------------------|------|--------|
| POL054 | Sam          | sativa    | POL | Sam                   | 1999 |        |
| PRT005 | 2416         | sativa    | PRT |                       |      |        |
| ROM007 | ROM007-15135 | sativa    | ROM | Lapustesti            |      |        |
| ROM007 | ROM007-16701 | sativa    | ROM | Mures                 |      |        |
| ROM007 | ROM007-5087  | sativa    | ROM | SACEL                 |      |        |
| ROM007 | ROM007-5938  | sativa    | ROM | LUNCA ILVEI 2         |      |        |
| ROM007 | ROM007-9193  | sativa    | ROM | BAISOARA 1            |      |        |
| RUS001 | 200105652    | sativa    | RUS |                       | 1928 |        |
| RUS001 | 200107022    | sativa    | RUS |                       | 1928 |        |
| RUS001 | 200107910    | sativa    | RUS |                       | 1931 |        |
| RUS001 | 200109633    | sativa    | BYS | MULYAT                | 1939 |        |
| RUS001 | 200110507    | byzantina | ROM | AVENA AMARILLA        | 1950 | Spring |
| RUS001 | 200110788    | sativa    | MDA | Beltckii 1            | 1953 | Spring |
| RUS001 | 200110905    | sativa    | RUS | Kinelskii             | 1956 | Spring |
| RUS001 | 200111466    | sativa    | RUS |                       | 1967 |        |
| RUS001 | 200111655    | sativa    | GRC |                       | 1970 |        |
| RUS001 | 200113379    | sativa    | ISL |                       | 1980 |        |
| RUS001 | 200113917    | sativa    | RUS | Signal                | 1986 |        |
| SVK001 | 1005         | sativa    | SVK | Vendelin              |      |        |
| SVK001 | 19903        | sativa    | HUN | Gagybatory K Tajfajta | 2003 |        |
| SVK001 | 20063        | sativa    | SVK | Detvan                |      |        |
| SVK001 | Zvolen       | sativa    | CZE | Zvolen                | 2004 |        |
| SWE002 | NGB2710      | sativa    | SWE | Guldregn li           | 1927 |        |
| SWE002 | NGB5399      | strigosa  | SWE | PURRHAVRE             | 1991 |        |
| SWE002 | NGB6185      | sativa    | SWE | Fyris                 | 1911 |        |
| SWE002 | NGB8759      | strigosa  | DNK | Purhavre Fra Bur      | 1991 |        |
| SWE002 | NGB8760      | sativa    | NOR | Nidar II              | 1938 |        |
| SWE002 | NGB9722      | sativa    | DNK | Hedehavre Lyngby      | 1913 | Spring |
| SWE006 | Cilla        | sativa    | SWE | Cilla                 | 1998 |        |
| SWE006 | CPVO19960125 | sativa    | SWE | BELINDA               | 1997 |        |
| SWE006 | SW Ingeborg  | sativa    | SWE | SW Ingeborg           | 2007 |        |
