# Supplementary material for: Population structure and genome-wide association analysis for frost tolerance in oat using continuous SNP array signal intensity ratios
Source: PubMed Central journal article supplement (PMC4983288; doi:10.1007/s00122-016-2734-y), 2016-06-18

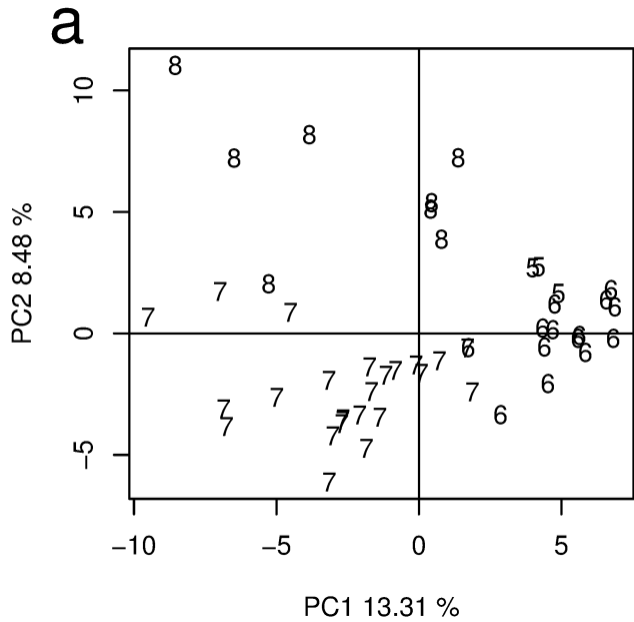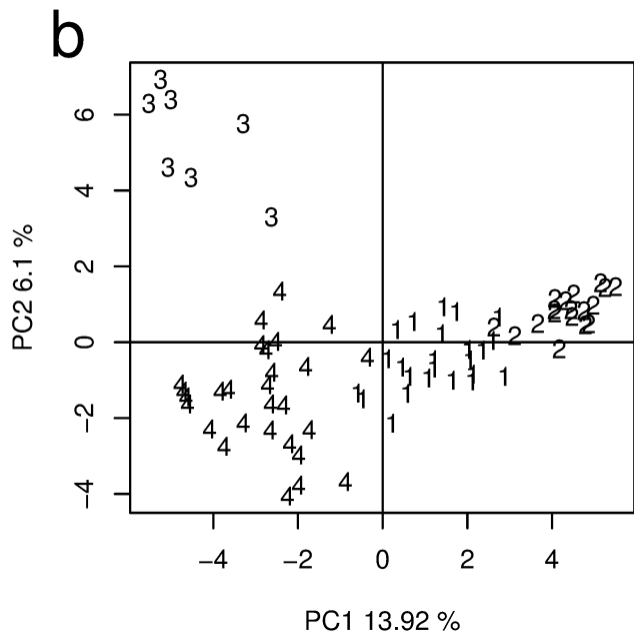

Supplement: 122_2016_2734_MOESM2_ESM.pdf [file 122_2016_2734_MOESM2_ESM.pdf]
